# Supplementary material for: Identification of Risk Loci for Radiotoxicity in Prostate Cancer by Comprehensive Genotyping of TGFB1 and TGFBR1
Source: MDPI journal article supplement (doi:10.3390/cancers13215585), 2021-11-08
Supplement: s1 [file s1]

# Supplementary Materials: Identification of Risk Loci for Radio-toxicity in Prostate Cancer by Comprehensive Genotyping of TGFB1 and TGFB1

Manuel Gühlich, Laura Hubert, Caroline Patricia Nadine Mergler, Margret Rave-Fraenk, Leif Hendrik Dröge, Martin Leu, Heinz Schmidberger, Stefan Rieken, Andrea Hille and Markus Anton Schirmer

## Supplementary Material

1. Supplementary Methods
2. Supplementary Tables: PCR primers, chemicals, kits, buffers, cell culture medium
3. Supplementary Figures

### 1. Supplementary Methods

#### *Selection of genetic polymorphisms for genotyping*

Data on genetic polymorphisms (single nucleotide and insertion/deletion) at the *TGFB1* and *TGFB1* sites have been downloaded from the 1000 human genome database ([www.internationalgenome.org/](http://www.internationalgenome.org/), integrated phase 1\_version 3 as accessed by January 2014 and based on genome assembly GRCh37.p13. Five Caucasian populations were considered comprising a total number of 379 individuals: CEU, Utah residents of north-western European descent, N=85; FIN, Finnish in Finland, N=93; GBR, British in England and Scotland, N=89; IBS, Iberian Population in Spain, N=14; TSI, Toscani in Italia, N=98. The combined set of these data were analyzed and visualized by HaploView software, version 4.2 ([www.broadinstitute.org/haploview/haploview](http://www.broadinstitute.org/haploview/haploview)) separately for the *TGFB1* and the *TGFB1* genetic locus (see Supplementary Figures 1 and 2 below). The considered loci for genotyping comprised the entire region of these two genes with additional 5 kb at the flanking 5'- and 3'-sites (core region). If there was high linkage disequilibrium (LD, dark coloring in Supplementary Figures 1 and 2) of genetic polymorphisms located within with such beyond the core

region the bioinformatics analysis was extended to regions until there was no high LD anymore (i.e.  $r^2 < 0.5$  with polymorphisms within the core region). Therefore, for *TGFB1* the 5'-upstream region was extended to 18 kb upstream and for *TGFBR1* to 6 and 10 kb upstream and downstream, respectively. Within these areas (in total 51 and 75 kb for *TGFB1* and *TGFR1*) genetic polymorphisms with a minor allele frequency (MAF) of at least 5% in the denoted five Caucasian populations were considered. Using the tagger algorithm implemented in the HaploView software a set of genetic polymorphisms covering the entire genetic variability with a  $MAF \geq 5\%$  in the defined areas at a pairwise stringency of  $r^2 = 0.80$  was determined. This means if two polymorphisms show a pairwise LD of  $r^2 \geq 0.80$  they were regarded as highly redundant and thus only one of them was selected for genotyping. Given these criteria, the bioinformatics analyses revealed 29 and 14 polymorphisms capturing the genetic diversity in the *TGFB1* and the *TGFBR1* area, respectively. The actually genotyped polymorphisms were 27 and 13 (see below).

### ***Genotyping***

Genomic DNA (gDNA) from whole EDTA-anticoagulated blood was isolated using the EZ1 DNA Blood 350  $\mu$ l Kit (Qiagen, Hilden, Germany) on a BioRobot® EZ 1 system (Qiagen). The genetic polymorphisms selected according to the above-mentioned bioinformatic procedures were analyzed via multiplex primer extension method. The genetic sites of interest were first amplified by PCR according to supplier's instructions (Multiplex PCR Kit, Qiagen). PCR was started with an initial activation step at 95.0°C for 15 min. Then 40 cycles were run each with annealing at 65.0°C for 30 s and elongation at 72°C at 90 s. The PCR was finalized by a single elongation step at 72°C for 10 min. PCR primer sequences are provided in Supplementary Table S1 below. The samples were purified from excessive primers and dNTPs of the PCR by *exonuclease I* (8 units per sample) and *shrimp alkaline phosphatase* (SAP, 0.8 units) for 3 h at 37°C. Afterwards, the enzymes were inactivated at 80°C for 15 min. Then, specific primers binding next to the polymorphic site to be assessed were added and elongated by one fluorescence-labeled nucleotide (SNaPshot™, Thermo Fisher Scientific, Waltham, MA,

USA). Following a second purification with 0.5 units SAP the samples were boiled in 10 µl Hi-Di™ formamide supplemented with a size standard (GeneScan™ LIZ® 120 Thermo Fisher). The elongated primers were then analyzed in a 16-capillary sequencer (3100 Genetic Analyzer, formerly Applied Biosystems, now Thermo Fisher).

For one of the 29 *TGFB1* area polymorphisms selected due to bioinformatic analyses, rs201415320 (14,492 and 15,374 bp upstream of the transcription and translation start site of the single validated *TGFB1* mRNA isoform) the approached multiplex genotyping assay failed with several attempts performed. Another polymorphism of this area, rs2873369 (7892 and 8774 bp upstream of *TGFB1* transcription and translation start), is located within a 292 bp deletion. This deletion is covered by the successfully assayed marker rs2241713 at  $r^2=0.97$ . Thus, genotyping of this 292 bp deletion with pertinent rs2873369 was spared. One out of the 14 polymorphisms of the *TGFB1* area (i.e. rs190034323) could not be verified in our analyses despite no hints for technical problems and was later on corrected in the 1000 human genome database to be monomorphic in Caucasians. The 27 and 13 genetic polymorphisms related to the *TGFB1* and *TGFB1* area determined in the clinical cohort of 240 patients (full data set presented in Supplementary Data Excel sheet).

## 2. Supplementary Tables

**Table S1:** Primer sequences used for PCR amplification of the regions of interest.

| Polymorphism | PCR forward primer (5'→3')      | PCR reverse primer (5'→3')      |
|--------------|---------------------------------|---------------------------------|
| <b>TGFB1</b> |                                 |                                 |
| rs73047224   | TCCTGGGCTAAACCAATCCTCTCTATC     | GGCACAACAAGGGCTGAGATTTG         |
| rs8108357    | "                               | "                               |
| rs75041078   | CGCACACCACCAAGTCCAGCTA          | GAGCCACTGAGACCACCTCTCTC         |
| rs8103493    | CCTGGTGGTTCATGGCTGTCTG          | TGTGCCCAGCCCCATATTCTATTG        |
| rs2241713    | ATGCCCCACTTGCAGAAGAGGCTAC       | CAGCAACAACCACGGAACCAAGAC        |
| rs199538573  | GCTGAAGTGGGTGGCCTGTTTG          | CCCACACCCTGTCCACATGAGTC         |
| rs1800468    | GGACCCAGAACGGAAGGAGAGTCAG       | TGCTGCATGGGGACACCATCTACA        |
| rs1800469    | "                               | "                               |
| rs1800470    | CCCCACCACACCAGCCCTGTT           | GCTTCACCAGCTCCATGTCGATAGTCTTG   |
| rs1800471    | "                               | "                               |
| rs6508976    | AGCTGACAGCTCTGGGGTGGAGTC        | AGGGGGAGAAACCACTTCCTCAAGGT      |
| rs8108632    | "                               | "                               |
| rs2241717    | TCGGCTGGTTACAAGGTCCACCTAG       | CCAGCTTGGCAACAGAGTGAGACAC       |
| rs76206979   | GCTGTTGGCACTCAAGACCTCAATTTG     | GGCTGGGATTACGGCTATCCAGGTAC      |
| rs73045292   | CCAGTATTGCATCCCAACATTCCAAAG     | GGCTGGGATTACGGCTATCCAGGTAC      |
| rs200419705  | GCTGTTGGCACTCAAGACCTCAATTTG     | TTTGGTCCTGTCTCTGGGCTTTGTTAC     |
| rs11466338   | "                               | "                               |
| rs2278422    | GCTGTTGGCACTCAAGACCTCAATTTG     | TTTGGTCCTGTCTCTGGGCTTTGTTAC     |
| rs11466344   | GGGACCCAATGTTGCCTAGGAAGTC       | CACACACCACCAGCCAGTAGT           |
| rs6508975    | CATGGGTCCTCTTACAAAATTCACCACTTAC | CCCCATGCAACCAAAAATTCACATACAAG   |
| rs11466345   | CAAACCCATGTCCAAGGGTCAGTCT       | CCTGCCTCAGTCTCCCAAGTAGCTAAG     |
| rs11466347   | CCCAGCTAGGGTTGAACTGCATATTAAAG   | CTGAACTCACAAAAGGGGAAGAACTAGTGTC |
| rs11466353   | CCAGAAGAAGGCAGGCAGAGAGTAATAG    | ATGTCCTTCACTCAGGGACCCTTAACTC    |
| rs8179181    | GAGGAGGGGCATGTGGCTTCT           | TGCGTGTCCAGGCTCCAAATGTAG        |
| rs7254679    | CTCCCCCACGACTTCCCTCT            | GCCCCGTCGGGACAAGTCTG            |
| rs73045282   | CTAACACGTGCTGGGGACACACA         | CAGTGTGGATTTCGATTTGTGTGTTT      |
| rs10417924   | CTAACACGTGCTGGGGACACACA         | CAGTGTGGATTTCGATTTGTGTGTTT      |
| Polymorphism | PCR forward primer (5'→3')      | PCR reverse primer (5'→3')      |

| TGFBRI      |                                 |                                 |
|-------------|---------------------------------|---------------------------------|
| rs149234874 | TGGTGCTTAAAGCCCGAATTCATGT       | CCCCACCCTCAATCACAAAGATTTTC      |
| rs72739266  | "                               | "                               |
| rs10819635  | GGTACAAGGAGCCTGGGAAATTGAC       | CCAGCAAGTCAGCTGCAGAGCTA         |
| rs10733708  | GCCTCAGTGTTAGCAACTAAAAATGCAGTGA | GCAAATGCCACTACTCCTGGGAGTTTAC    |
| rs6478974   | CTTGGCTGGAGAGGATGGCATGTG        | TCCCTCTGCGGCACAATTAGACATTC      |
| rs10512263  | GTCTGGGATTCTACAGTGGAATTTTGTC    | TTCGTAGGCCACCAAAGGTAAACTTC      |
| rs10988716  | CGGAAGGAGGTGTCTTCGTTTACG        | TTCACCACTTGAAGTCAGTCTTGATTG     |
| rs11568785  | TGTGGGATTTAGATGCCAGTATATCTC     | GGAGCAGTTGTTGCCTAGGGCTAAG       |
| rs10733710  | CCTGCTCTGAAGCCAGAGTTACCTGAC     | GCAGGGCTAGCTACTGCACAGTATTTG     |
| rs11386616  | ACAAATGCCCTGGCTTAAAGCAACAC      | ACCCCTGGCCAACCTGTCTTACAAC       |
| rs34733091  | TGCCGAGAGAAATCAAAGGATCTAAATGAG  | GGGTAAGGCAATTCCTCCAATTTTGTG     |
| rs3983364   | AACTCGCCTTTGCCAGTTTTTGTTG       | CTGAGCCTTGGGGTTGATTCAAGTTAG     |
| rs78471739  | CCCAGATTTCAGGTCTGTGCAGATCTC     | CCACATTTTCTAGCTGGCGTAGGAGATATTG |

**Table S2:** Chemicals and kits

| Chemical/kit                                                        | Provider                                   |
|---------------------------------------------------------------------|--------------------------------------------|
| 5-FU (5-Fluoruracil)                                                | Medac, Hamburg, Germany                    |
| Anti-phospho-Histone H2A.X (Ser139), FITC-markiert,<br>Klon JBW 301 | Merck Chemicals, Darmstadt, Germany        |
| BSA                                                                 | Sigma-Aldrich Chemie, Taufkirchen, Germany |
| CountBright™ Absolute Counting Beads                                | Thermo Fisher Scientific, Waltham, MA, USA |
| Exonuclease 1                                                       | Thermo Fisher Scientific, Waltham, MA, USA |
| EZ1 DNA Blood 350 µl Kit                                            | Qiagen, Hilden, Germany                    |
| FCS (fetal calf serum)                                              | Thermo Fisher Scientific, Waltham, MA, USA |
| GeneScan™ LIZ® 120                                                  | Thermo Fisher Scientific, Waltham, MA, USA |
| herring sperm DNA                                                   | Sigma-Aldrich Chemie, Taufkirchen, Germany |
| Hi-Di™ formamide                                                    | Thermo Fisher Scientific, Waltham, MA, USA |
| mouse serum                                                         | Thermo Fisher Scientific, Waltham, MA, USA |
| Multiplex PCR Kit                                                   | Qiagen, Hilden, Germany                    |
| Natriumazid (NaN <sub>3</sub> )                                     | AppliChem, Darmstadt, Germany              |
| Natriumfluorid (NaF)                                                | AppliChem, Darmstadt, Germany              |
| Natriummetavanadat                                                  | Sigma-Aldrich Chemie, Taufkirchen, Germany |
| Natriummolybdat (Na <sub>2</sub> MoO <sub>4</sub> )                 | Sigma-Aldrich Chemie, Taufkirchen, Germany |
| PBS Pulver (Dulbeccos 10-fold)                                      | AppliChem, Darmstadt, Germany              |
| Penicilline / Streptomycine                                         | Thermo Fisher Scientific, Waltham, MA, USA |
| Propidiumiodid                                                      | Becton Dickinson, Franklin Lakes, NJ, USA  |
| RNase A (70 %)                                                      | AppliChem, Darmstadt, Germany              |
| RPMI-1640 medium                                                    | Thermo Fisher Scientific, Waltham, MA, USA |
| Recombinant human TGFβ <sub>1</sub>                                 | PromoCell, Heidelberg, Germany             |
| Shrimp alkaline phosphatase                                         | Thermo Fisher Scientific, Waltham, MA, USA |
| SNaPshot™                                                           | Thermo Fisher Scientific, Waltham, MA, USA |
| Triton X-100                                                        | Carl Roth KG, Karlsruhe, Germany           |
| Tris 100 %                                                          | Carl Roth KG, Karlsruhe, Germany           |
| Vibrant® DyeCycle™ Ruby Stain                                       | Thermo Fisher Scientific, Waltham, MA, USA |

**Table S3:** Buffers and cell culture medium

| Buffer/medium           | Ingredients                                                                                                                                                                                                                               |
|-------------------------|-------------------------------------------------------------------------------------------------------------------------------------------------------------------------------------------------------------------------------------------|
| Block-9 staining buffer | PBS with<br>1 g/l BSA<br>8 % mouse serum<br>0.1 g/l RNase A<br>10 mM NaF<br>1 mM Na <sub>2</sub> MoO <sub>4</sub><br>1 mM NaVO <sub>3</sub><br>0.25 g / l herring sperm DNA<br>0.1 % Triton X-100<br>5 mM EDTA<br>0.05 % NaN <sub>3</sub> |
| Cell culture medium     | RPMI-Medium with<br>15 % FCS<br>1 % Penicilline/Streptomycine                                                                                                                                                                             |
| PBS (pH 7.4)            | 128.5 mM NaCl<br>2.8 mM KCl<br>8.1 mM Na <sub>2</sub> PO <sub>4</sub><br>1.5 mM KH <sub>2</sub> PO <sub>4</sub>                                                                                                                           |
| Suspension Buffer       | PBS mit<br>1 g/l BSA                                                                                                                                                                                                                      |
| TE-Puffer (pH 7.5)      | 10 mM Tris<br>1 mM EDTA                                                                                                                                                                                                                   |

**Table S4:** Distribution of rectum, bladder, and combined toxicities

|                        |                 | Toxicity grade, No. (%) |            |           |         |
|------------------------|-----------------|-------------------------|------------|-----------|---------|
|                        |                 | 0                       | 1          | 2         | 3       |
| Acute ( <i>n</i> =240) | Rectum          | 65 (27.1)               | 119 (49.6) | 55 (22.9) | 1 (0.4) |
|                        | Urinary bladder | 79 (32.9)               | 134 (55.8) | 26 (10.9) | 1 (0.4) |
|                        | Combined        | 30 (12.5)               | 139 (57.9) | 69 (28.8) | 2 (0.8) |
| Late ( <i>n</i> =238)  | Rectum          | 162 (68.1)              | 40 (16.8)  | 32 (13.4) | 4 (1.7) |
|                        | Urinary bladder | 168 (70.6)              | 56 (23.5)  | 9 (3.8)   | 5 (2.1) |
|                        | Combined        | 130 (54.1)              | 62 (25.8)  | 38 (15.8) | 8 (3.3) |

Acute toxicity was scored according to CTCAE, version 3.0, and late by LENT-SOMA, version 3.0.

*Abbreviations:* CTCAE = Common Toxicity Criteria assessment for Adverse Events; LENT-SOMA = Late Effects of Normal Tissues - Subjective, Objective, Management criteria with Analytic laboratory and imaging procedures.



### 3. Supplementary Figures

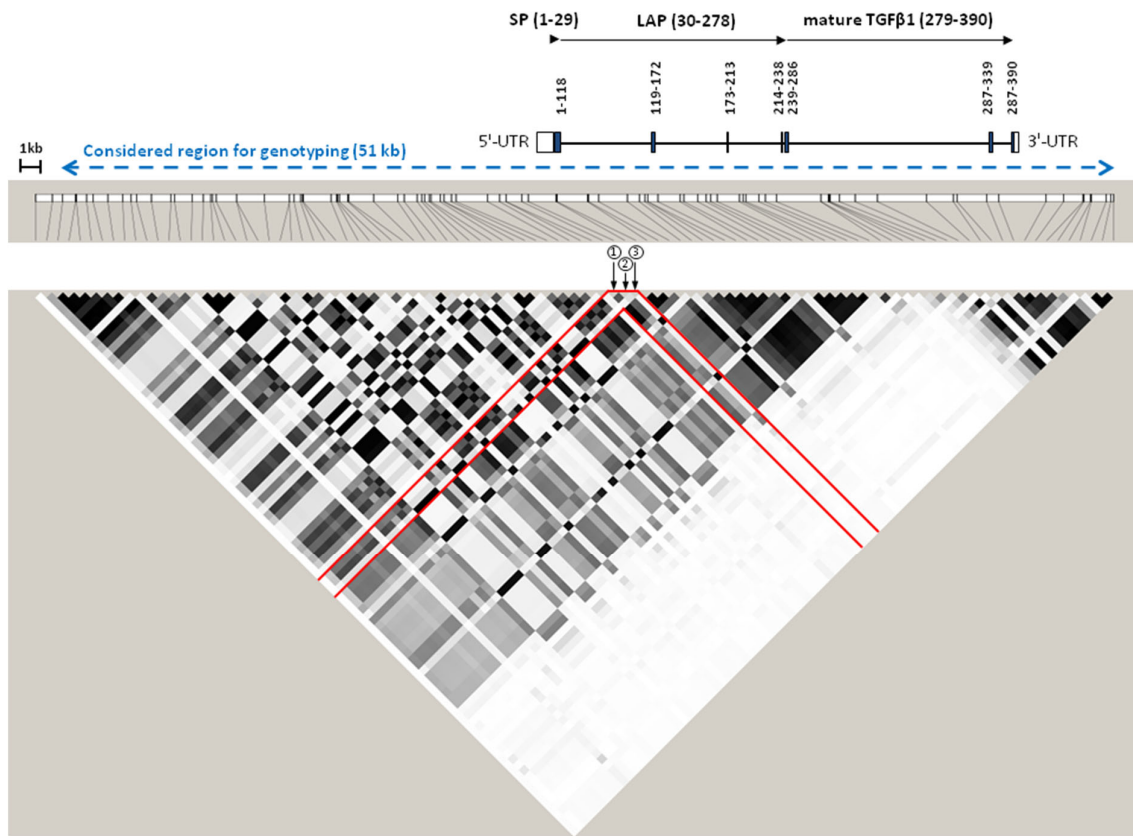

**Figure S1.** Plot of pairwise linkage disequilibrium at the *TGFβ1* genetic region constructed from data based on Caucasian populations as described in the Methods section, chapter 2.4. SP = signal peptide, 1kb = 1,000 base pairs; three polymorphisms most investigated in literature are particularly denoted: ① = -509C>T (rs1800469), ② = 869T>C (rs1800470), ③ = 915G>C (rs1800471).

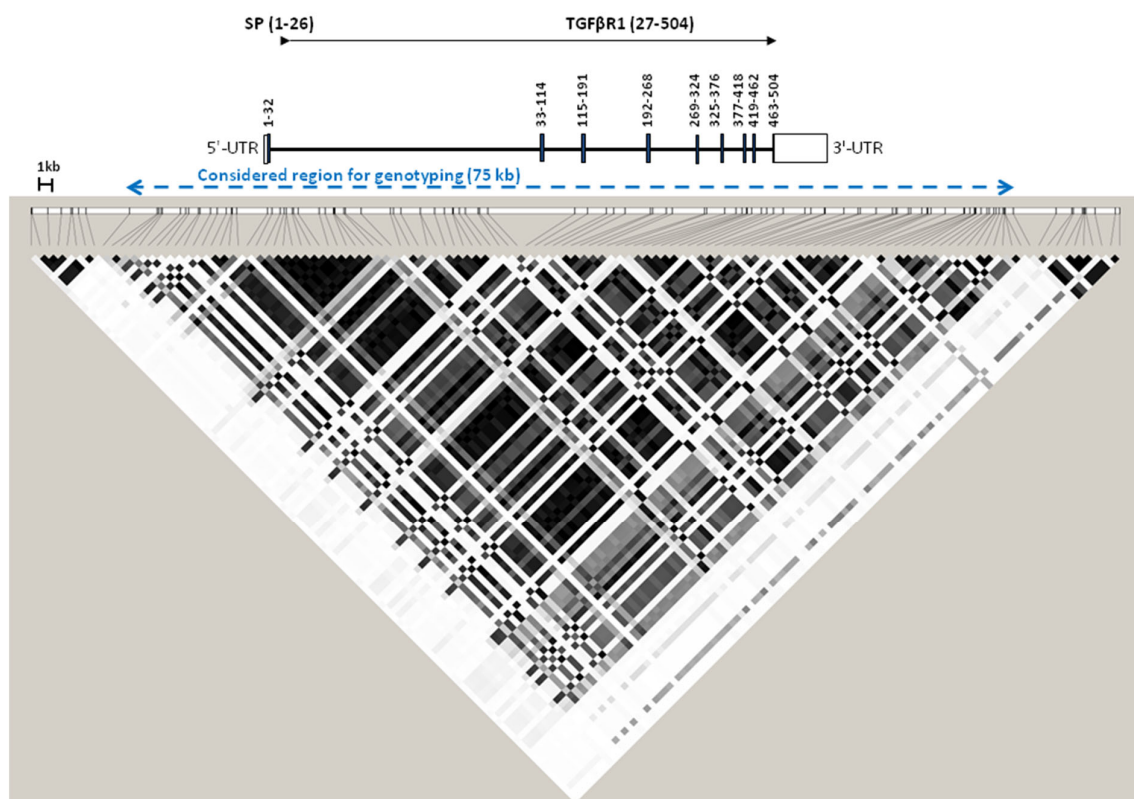

**Figure S2.** Pairwise linkage disequilibrium at the *TGFBR1* genetic region based on the same populations used for Supplementary Figure 1.

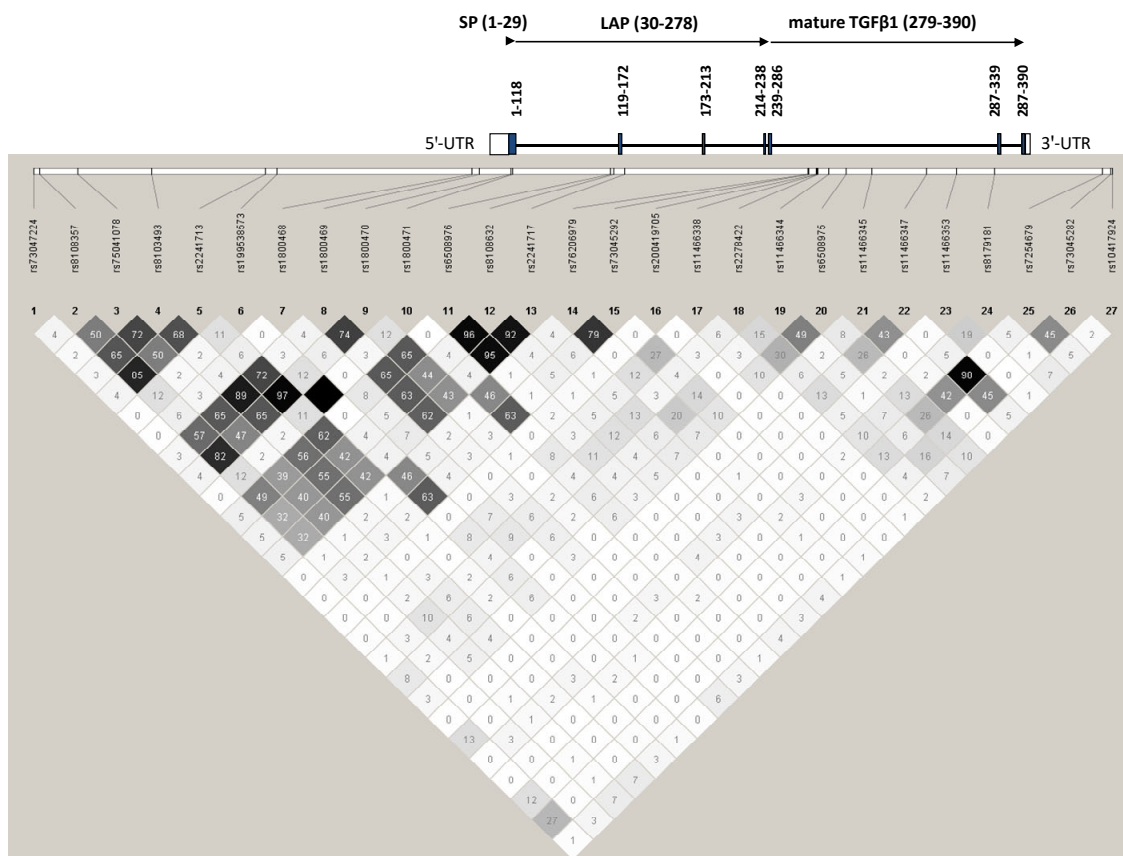

**Figure S3.** Pairwise linkage disequilibrium of the 27 *TGFβ1* polymorphisms analyzed in the study population.

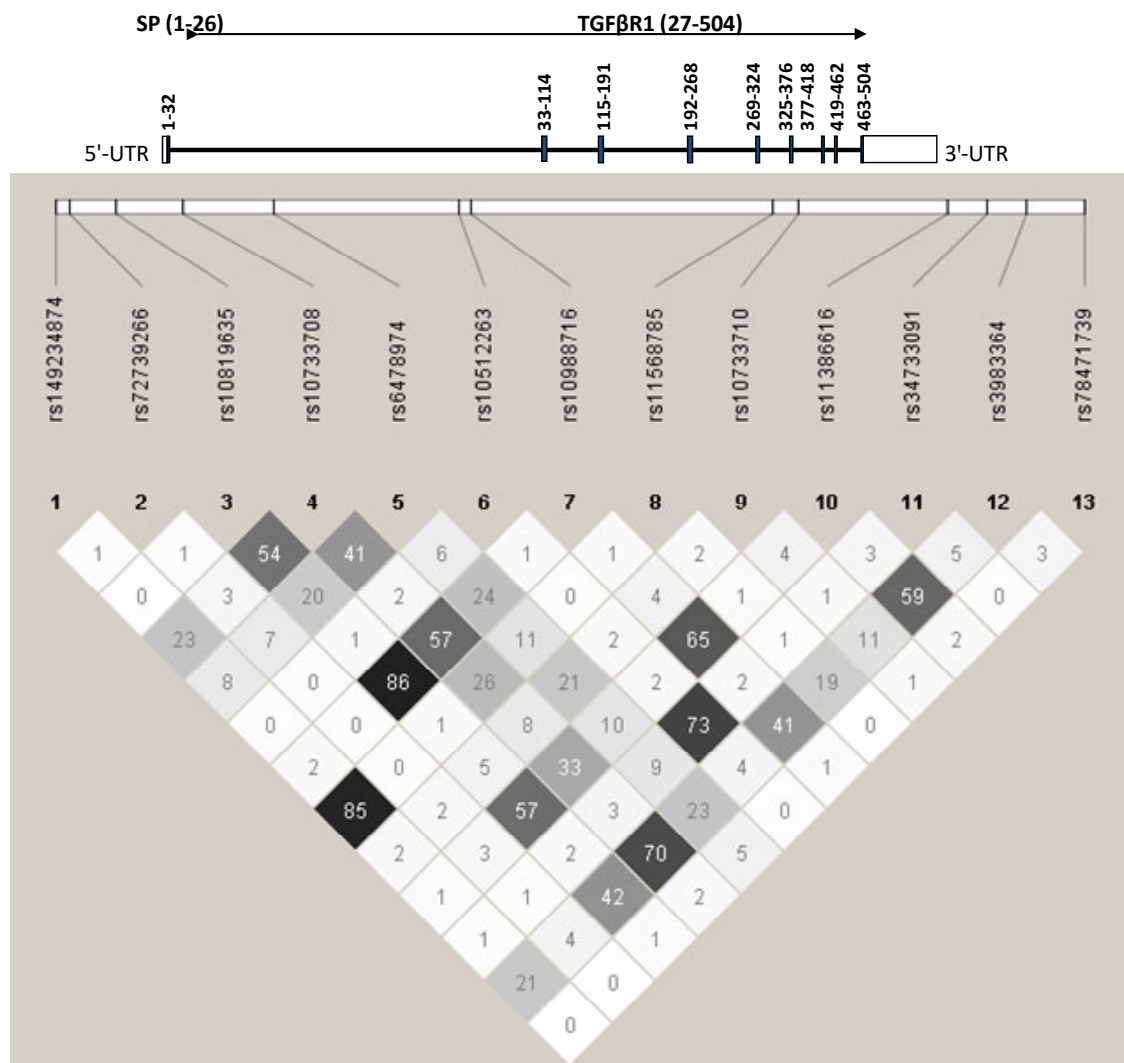

**Figure S4.** Pairwise linkage disequilibrium of the 13 *TGFBR1* polymorphisms analyzed in the study population.
